# Supplementary material for: HAP-01, the first chromogenic substrate forAspergillus oryzaeacid protease
Source: Royal Society of Chemistry journal article supplement (doi:10.1039/c8ob02766h), 2018-12-20
Supplement: c8ob02766h1.pdf [file c8ob02766h1.pdf]

## Electronic Supplementary Information

for

# HAP-01, the first chromogenic substrate for *Aspergillus oryzae* acid protease

Taku Yoshiya,<sup>\*a</sup> Nobuo Yamashita,<sup>b</sup> Shugo Tsuda,<sup>a</sup> Koushou Oohigashi,<sup>b</sup> Shun Masuda,<sup>a</sup>

Takafumi Kubodera<sup>b</sup> and Takahito Akashi<sup>b</sup>

<sup>a</sup> Peptide Institute, Inc., Ibaraki, Osaka, Japan

<sup>b</sup> Research Department, Hakutsuru Sake Brewing Co. Ltd., Kobe, Hyogo, Japan

## Methods for enzymatic assays

### I-i. Primary screening of substrate specificity using FRETs-25 substrates

10  $\mu$ L of koji extract was added to 190  $\mu$ L of 100  $\mu$ M FRETs substrate solution (pH 3 “McIlvaine” citric acid-phosphoric acid buffer), and the increase in fluorescence (excitation wavelength 340 nm; fluorescent wavelength 440 nm) in the first 10 min was monitored using a plate reader (Infinite M200 PRO, Tecan Group Ltd., Switzerland) set at 40 °C.

### I-ii. Secondary screening of substrate specificity using selected FRETs-25 substrates

10  $\mu$ L of koji extract was added to 190  $\mu$ L of 100  $\mu$ M FRETs substrate solution (pH 3 “McIlvaine” citric acid-phosphoric acid buffer) and the mixture was reacted for 10 min using a plate reader set at 40 °C. Then, 200  $\mu$ L of 0.4M trichloroacetic acid aqueous solution was added to stop the enzymatic reaction, and the reaction was monitored by LC-fluorescence-MS to estimate the structure and relative amounts of fluorescent enzymatic digestion fragments.

## II. Release of pNP from substrates and enzymatic digestion fragments

Two putative substrates and two predicted enzymatic digestion fragments were dissolved in water at 1 mg/50  $\mu$ L, diluted 100 times with various buffers or water, and left to stand at room temperature, respectively. Reactions were monitored with reversed-phase HPLC after adding 10  $\mu$ L of trifluoroacetic acid for each 70  $\mu$ L of solution to stop the reaction.

## III. Confirmation of substrate cleavage by koji

HAP-01 was added to koji extract prepared from 70% polished rice and *Aspergillus oryzae* until it reached 100  $\mu$ M, and the mixture was leaved at 30 °C. At various time points, the aliquot taken from the reaction mixture was analyzed by RP-HPLC after addition of 0.4 M aqueous trichloroacetic acid of the same quantity as the sampled solution to stop the enzymatic reaction.

## IV. Quantitative analysis of AP activity using a plate reader.

Enzyme solutions at pH 3 of various *A. oryzae* AP activity (100–600 U/mL) were prepared using many types of koji (various AP activity) according to the standard method established by National Tax Administration Agency (for details, please refer to the following web site (<https://www.nta.go.jp/law/tsutatsu/kobetsu/sonota/070622/pdf/211.pdf>)), and HAP-01 was added to 500  $\mu$ M for each solution. After leaved for 20 min at 40 °C, and a sodium carbonate aqueous solution was added and leaved for a further 30 min at 55 °C at pH 10. Then, absorption at 400 nm was monitored.

### Characterisation data for HAP-01

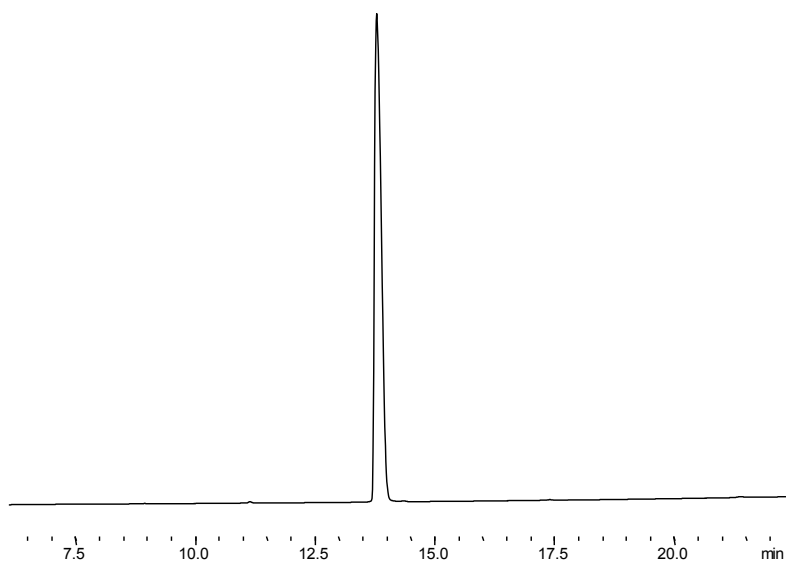

**Fig S1.** HPLC profile of HAP-01. (Conditions: 1–60% CH<sub>3</sub>CN for 25 min (detection at 220 nm) using a Shimadzu liquid chromatograph Model LC-10A with YMC-Pack ODS-A (4.6 x 150 mm) column and the following solvent systems: 0.1% TFA in H<sub>2</sub>O and 0.1% TFA in CH<sub>3</sub>CN at a flow rate of 1 mL min<sup>-1</sup> (40 °C))

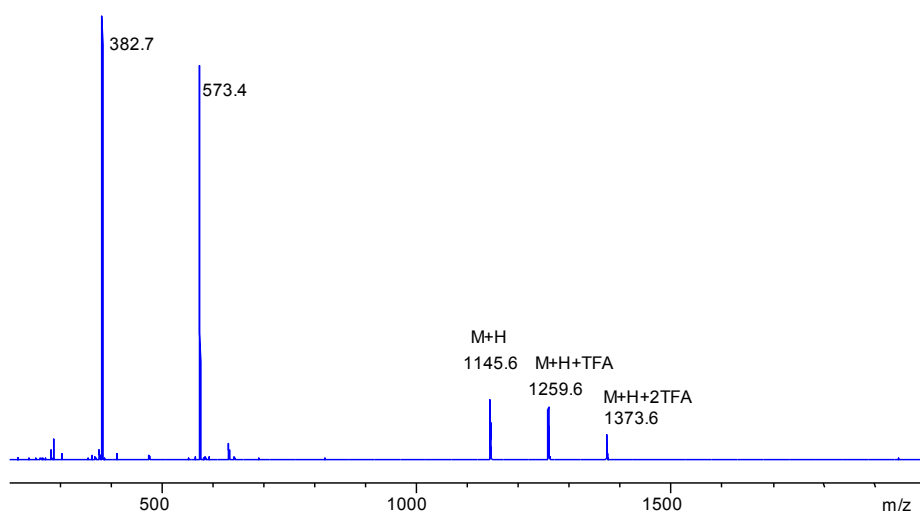

**Fig S2.** ESI-MS spectrum of HAP-01. (Conditions: an Agilent G1956B LC/MSD detector with an Agilent 1100 series HPLC system)
